# Supplementary material
Source: PubMed Central journal article supplement (PMC2965532)

Control

Nestin-Cre/DG null

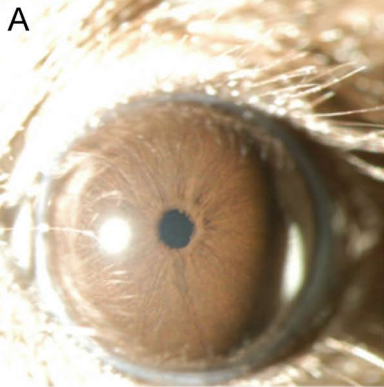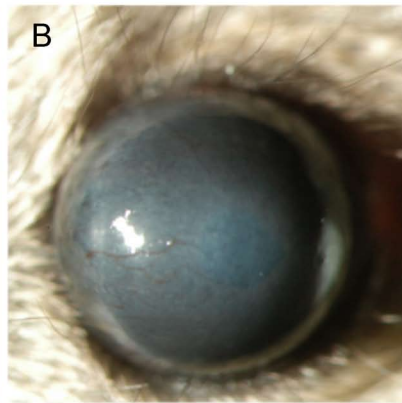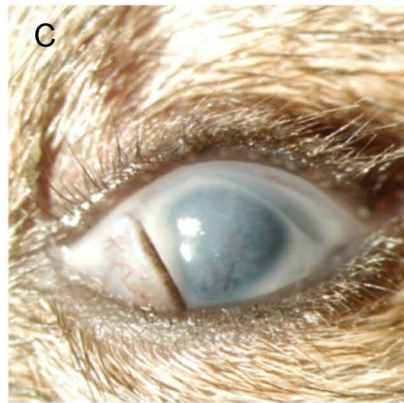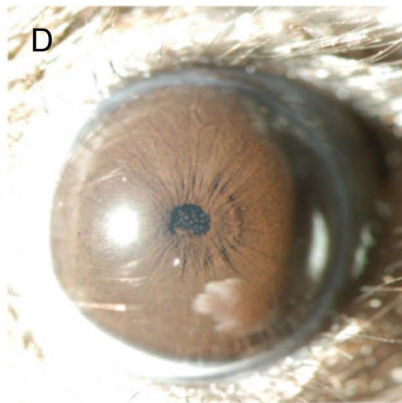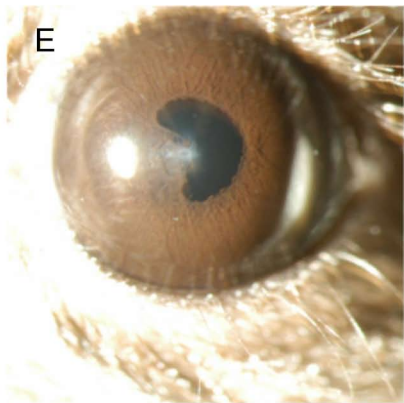

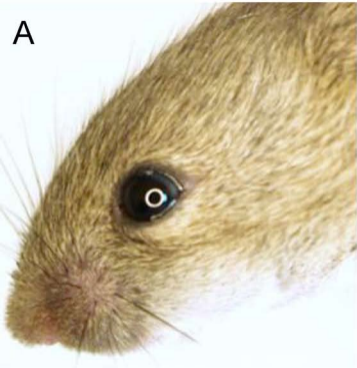

WT

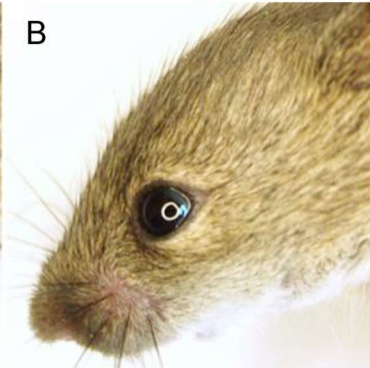

Nestin

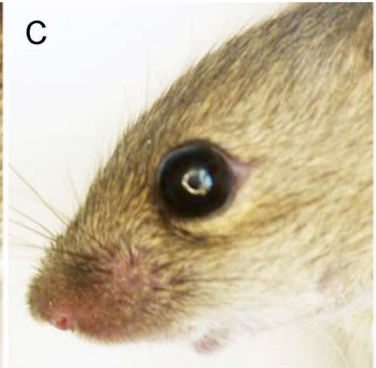

A

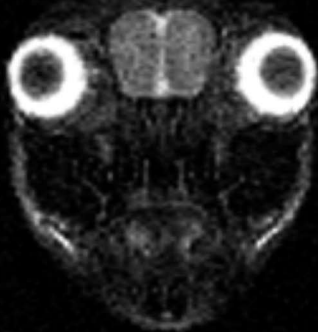

B

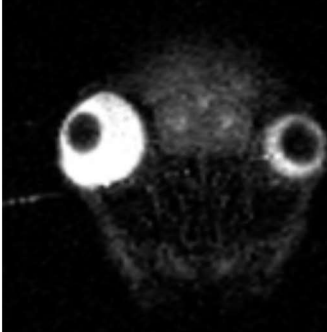

C

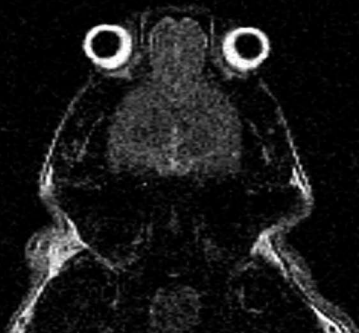

WT

D

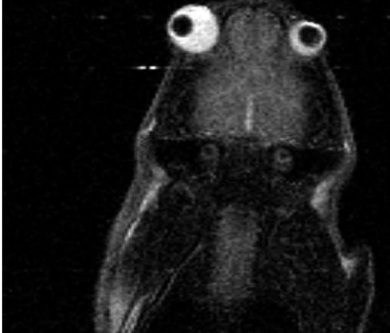

Nestin

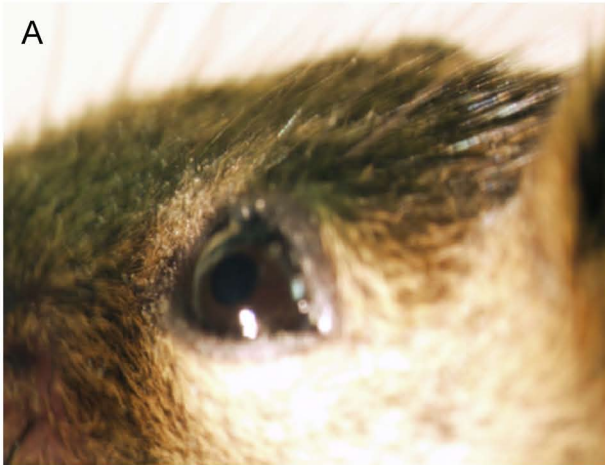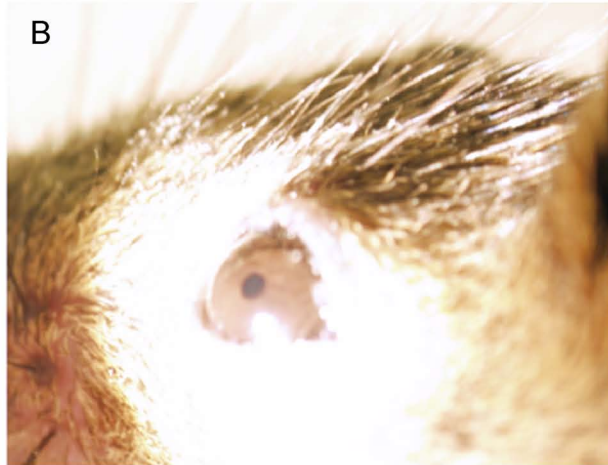

Control

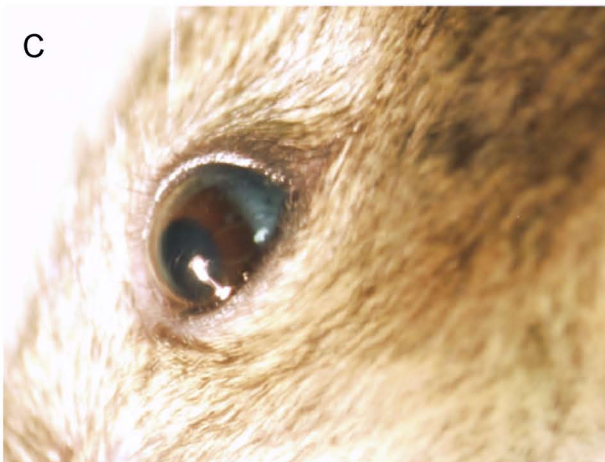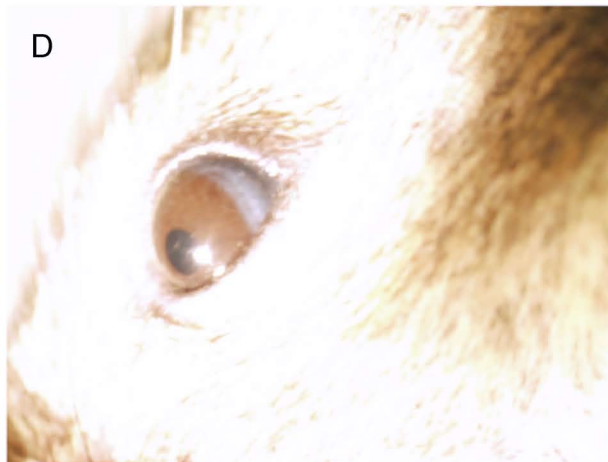

Nestin

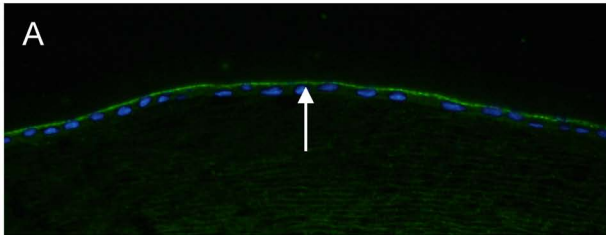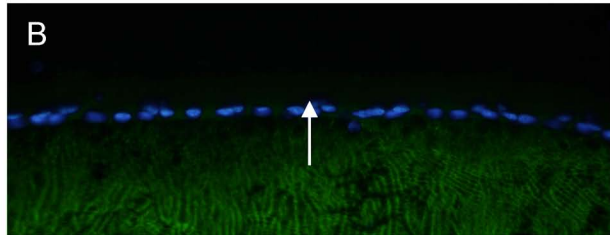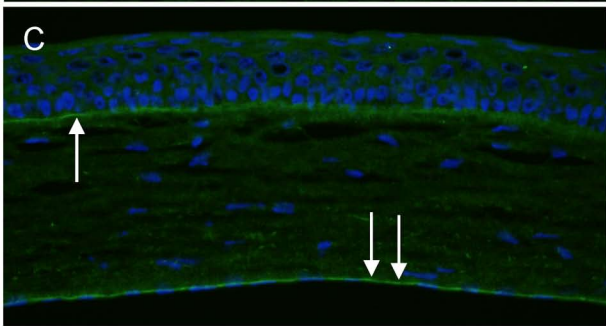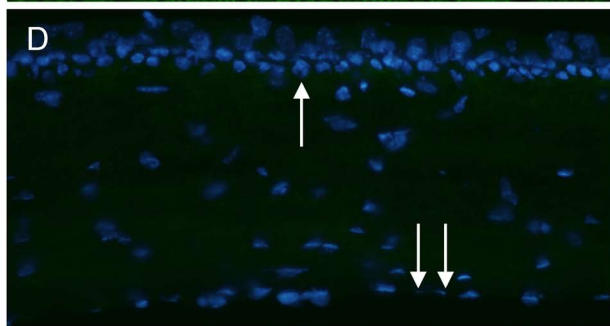

Control

Nestin-Cre/DG null

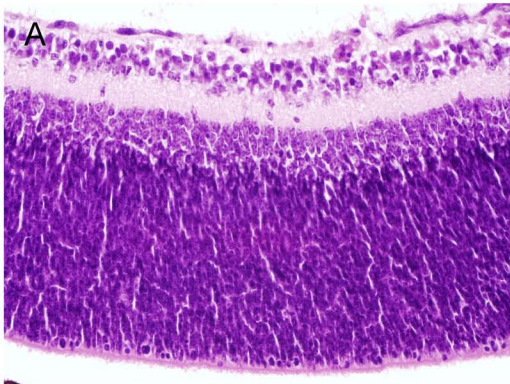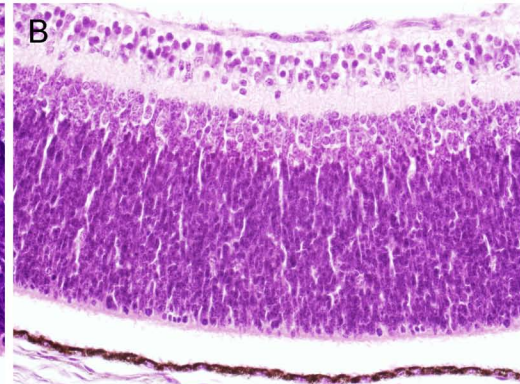

P2

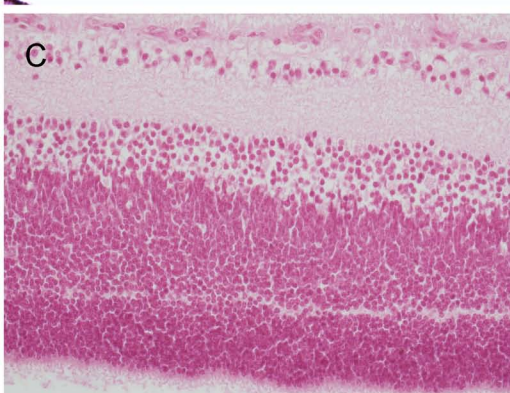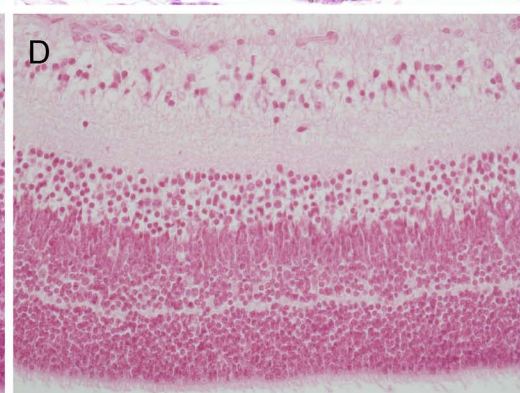

P7

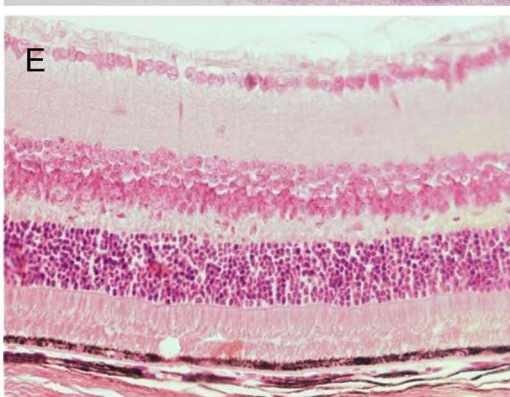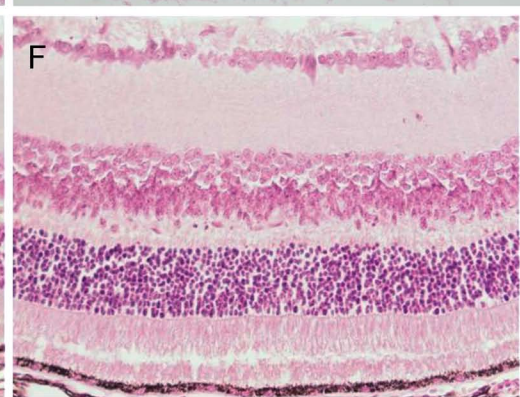

Adult

WT

Nestin

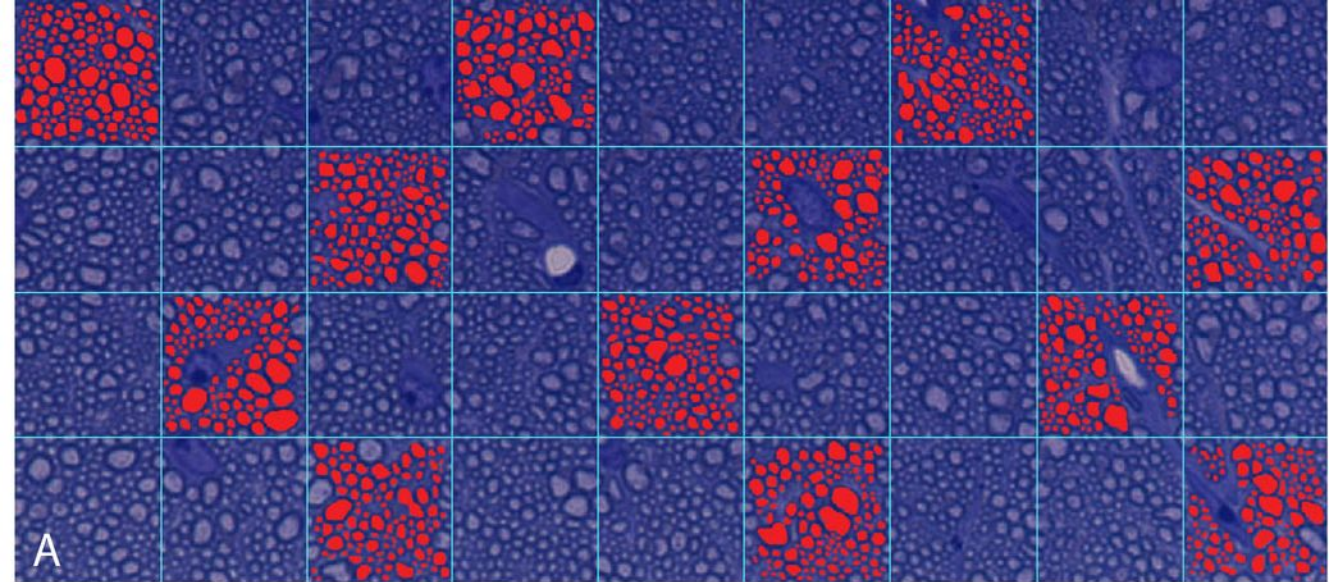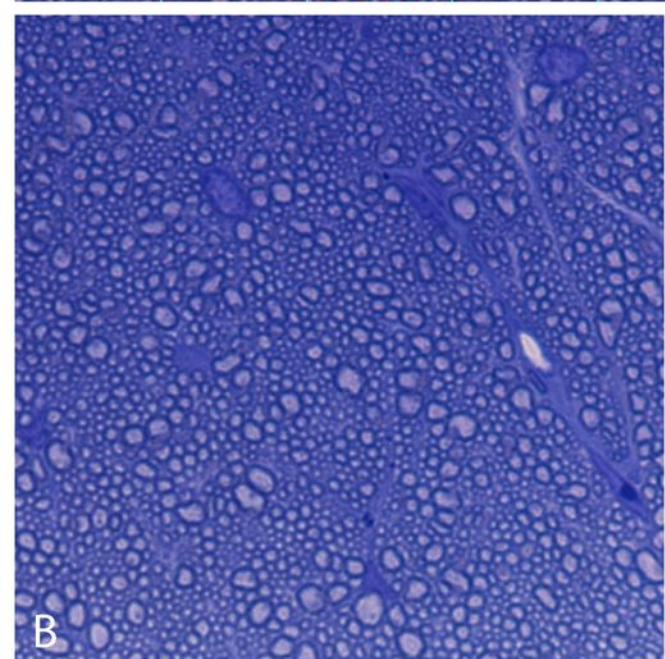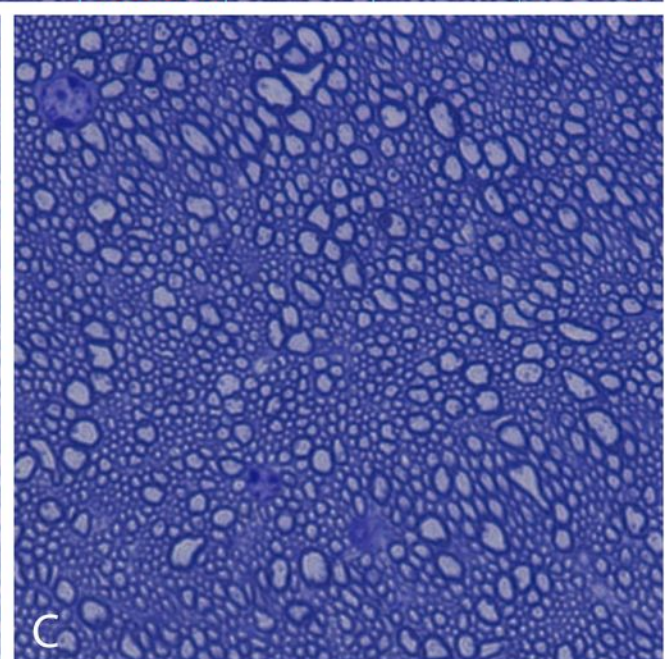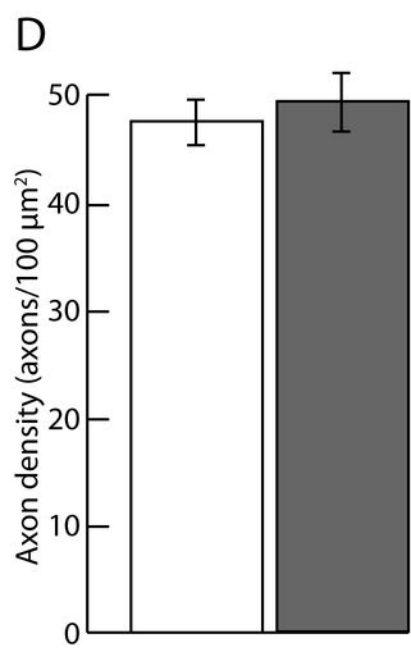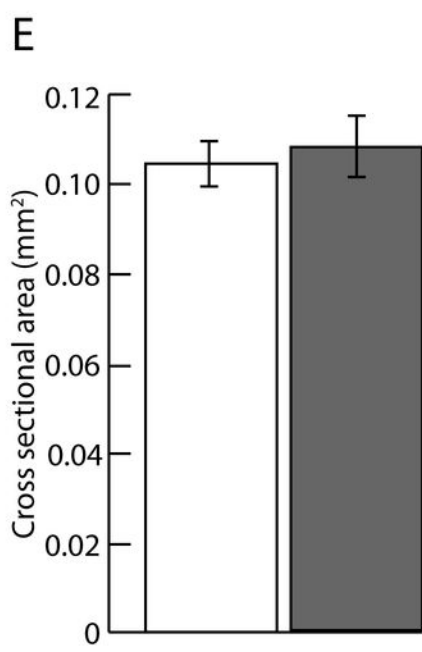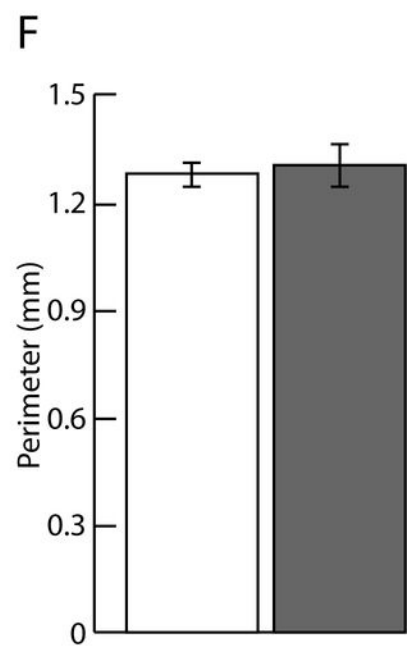

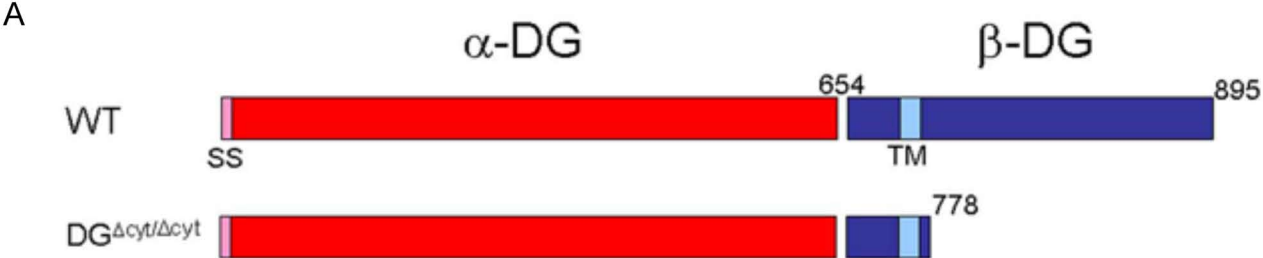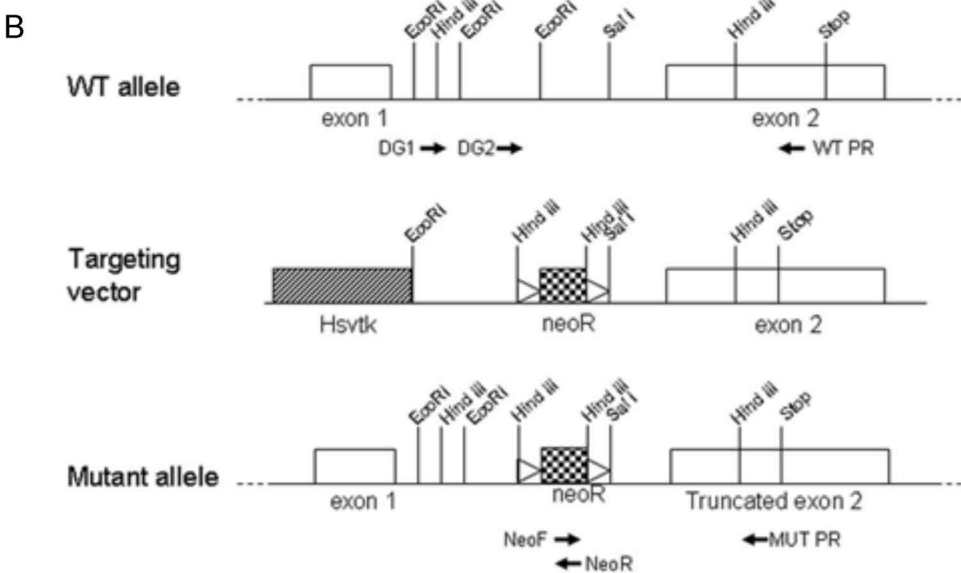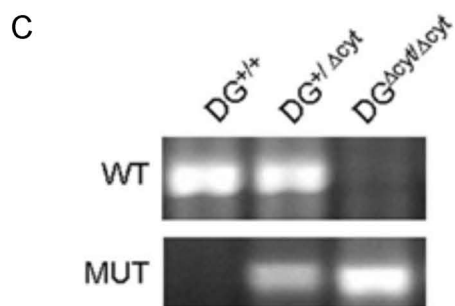

Supplement: NIHMS159463-supplement-Supp1.pdf [file NIHMS159463-supplement-Supp1.pdf]
